# Supplementary material for: Off to the Organelles - Killing Cancer Cells with Targeted Gold Nanoparticles
Source: PubMed Central journal article supplement — Theranostics. 2015 Jan 21;5(4):357–70. doi: 10.7150/thno.10657 (PMC4329500; doi:10.7150/thno.10657), 2015-01-21
Supplement: thnov05p0357s1.pdf [file thnov05p0357s1.pdf]

**Table S1.** Impact of AuNP size, morphology and functionalization on cellular uptake, subcellular localization and cell survival. Mammalian cells were incubated with AuNPs and different parameters related to AuNP – cell interactions were measured. It should be emphasized that AuNPs, even if not functionalized, acquire a serum protein coat when exposed to the growth medium. Results listed in the table are not comprehensive; we focus on data that are relevant to the subcellular distribution of AuNPs. Peptide sequences are shown in the one-letter code. Of note, some publications report AuNP size based on transmission electron microscopy, whereas others provide data for dynamic light scattering.

| Cells analyzed                                                                                             | AuNP morphology | AuNP size                                                              | AuNP surface modification                                                                                                               | Incubation time                      | Cellular Uptake                                                                                                                                                                                                                                                                                                                                                                                                        | Subcellular localization                                                                 | Elimination                                                                                                                                                                                                                                                                                                                                         | Cytotoxicity                                                                                         | Ref. |
|------------------------------------------------------------------------------------------------------------|-----------------|------------------------------------------------------------------------|-----------------------------------------------------------------------------------------------------------------------------------------|--------------------------------------|------------------------------------------------------------------------------------------------------------------------------------------------------------------------------------------------------------------------------------------------------------------------------------------------------------------------------------------------------------------------------------------------------------------------|------------------------------------------------------------------------------------------|-----------------------------------------------------------------------------------------------------------------------------------------------------------------------------------------------------------------------------------------------------------------------------------------------------------------------------------------------------|------------------------------------------------------------------------------------------------------|------|
| HeLa (human cervix carcinoma)                                                                              | Spheres, rods   | Spheres: 14, 30, 50, 74, 100nm diameter;<br><br>Rods: 40x14nm, 74x14nm | Citrate, transferrin                                                                                                                    | 6h                                   | Receptor mediated endocytosis.<br><br>Size-dependent uptake of AuNPs; Uptake of spheres 14nm: 622/h; 50nm: 1294/h; 74nm: 417/h; uptake of nanorods less efficient than spheres; less uptake of transferrin-coated AuNPs                                                                                                                                                                                                | Cytoplasmic vesicles                                                                     | N.D.                                                                                                                                                                                                                                                                                                                                                | Viability 98%                                                                                        | [49] |
| HeLa (human cervix carcinoma);<br><br>SNB19 (human glioblastoma);<br><br>STO (mouse embryonic fibroblasts) | Spheres, rods   | Spheres: 14, 30, 50, 74, 100nm;<br><br>Rods: 20x30, 14x50, 7x42nm      | Transferrin                                                                                                                             | Not specified                        | Receptor mediated endocytosis; time [h] to reach 50% of equilibrium concentration; 14nm AuNPs: HeLa – 1.19, SNB19 – 2.02, STO - 2.45<br><br>50nm AuNPs: HeLa – 1.71, SNB19 - 1.88, STO - 2.10<br><br>74nm AuNPs: HeLa - 2.12 SNB19 - 2.52 STO - 2.88;<br><br>Lower uptake of transferrin-coated rods as compared to transferrin-coated spheres; less uptake of transferring-coated AuNPs as compared to uncoated AuNPs | Intracellular                                                                            | Removal; time [min] to reach 50% of equilibrium concentration;<br><br>14nm AuNPs: HeLa – 0.33, SNB19 – 0.41, STO – 0.33<br><br>50nm AuNPs: HeLa – 0.50, SNB19 - 0.58, STO - 0.41<br><br>74 nm AuNPs: HeLa – 0.75 SNB19 – 0.66 STO - 0.58<br><br>14nm spheres more efficiently removed than 50nm spheres; rods more efficiently removed than spheres | N.D., but not toxic in earlier studies.                                                              | [50] |
| TE85 (human osteosarcoma)                                                                                  | Spherical       | ~5nm diameter                                                          | Unmodified AuNPs; cell penetrating peptide: AAVALLPAVLLA LLAP;<br><br>NLS:PKKKRKV;<br><br>combination peptide: PKKKRKVAAVA LLPAVLLALLAP | 3h                                   | Low entry of unmodified AuNPs; uptake when modified with cell penetrating peptide or NLS; highest uptake with combination peptide                                                                                                                                                                                                                                                                                      | Membrane-bound compartments; likely endosomes                                            | N.D.                                                                                                                                                                                                                                                                                                                                                | N.D.                                                                                                 | [51] |
| A549 (human lung carcinoma);<br><br>16HBE (human bronchial epithelium);<br><br>MSCs (bone marrow)          | Nanorods        | Length 55.6 ± 7.8nm, width 13.3 ± 1.8nm                                | Cetyltrimethylammonium bromide (CTAB) bilayer                                                                                           | 0.5 , 1.5 , 3 , 6 , 12 , 24, 48, 72h | Endocytosis; mostly clathrin-dependent;<br><br>AuNPs/cell after 72h incubation;<br><br>A549 : 12783±1787;                                                                                                                                                                                                                                                                                                              | A549: mitochondria<br><br>16HBE: endosomes, lysosomes,<br><br>MSCs: endosomes, lysosomes | A549 and 16HBE: not eliminated after 72h;<br><br>MSCs: elimination begins within 24h                                                                                                                                                                                                                                                                | For 72h incubation; A549: mitochondrial damage; 27% viability with 50 µM AuNPs; 10% with 100µM AuNPs | [47] |

|                                                                                                                         |               |                                                            |                                                                                                                                                                                                                                                        |               |                                                                                                                                                |                                                   |      |                                                                                                                                |      |
|-------------------------------------------------------------------------------------------------------------------------|---------------|------------------------------------------------------------|--------------------------------------------------------------------------------------------------------------------------------------------------------------------------------------------------------------------------------------------------------|---------------|------------------------------------------------------------------------------------------------------------------------------------------------|---------------------------------------------------|------|--------------------------------------------------------------------------------------------------------------------------------|------|
| mesenchymal stem cells)                                                                                                 |               |                                                            |                                                                                                                                                                                                                                                        |               | 16HBE: 2080±345<br><br>MSCs:<br>faster uptake at early time points;<br>reach steady-state concentration faster                                 |                                                   |      | 16HBE: minor toxicity<br><br>MSCs: almost no toxicity                                                                          |      |
| HeLa (human cervix carcinoma)                                                                                           | Not specified | 13, 30, 60nm                                               | CALNN and/or CALNNR8 (R8 = 8 arginine residues)                                                                                                                                                                                                        | 0-24h         | CALNN alone - poor internalization<br><br>CALNNR8:<br>CALNN (ratio 1:9); number of AuNPs internalized depends on their size;<br>13nm>30nm>60nm | CALNN + CAL-<br>NNR8: Nucleus<br><br>CALNNR8: ER  | N.D. | 95% cell death with 0.32nM AuNP for 24h<br><br>(CALNNR8:CALNN ratio 1:9)                                                       | [52] |
| CHO (Chinese hamster ovary)                                                                                             | Not specified | 13nm                                                       | Fluorescein isothiocyanate (FITC), cell penetrating peptides Penetratin: CRQI-LIWFQNRMRKWK; TAT: CYGRKKRRQRRR, combined with lysosomal sorting peptides: L1: YQRLC, L2: CNPGY                                                                          | 12h           | Uptake after 12h:<br>0.2-1µM/µg total cell protein; AuNPs conjugated with Penetratin and lysosomal sorting peptides show highest uptake        | Lysosome                                          | N.D. | Viability<br>≥70% for different peptide combinations tested                                                                    | [53] |
| SKBR3 (human breast carcinoma, HER2-overexpression);<br><br>MCF7 (human breast carcinoma)                               | Not specified | 14nm                                                       | Raman reporter, mixed polymer brushes of hydrophilic PEG and hydrophobic copolymer of methyl methacrylate and 4-vinylpyridine; anti-Her2 antibody                                                                                                      | 30 – 90min    | SKBR3: receptor mediated uptake ;<br><br>MCF7: low level uptake                                                                                | Endosome / lysosome                               | N.D. | Viability for SKBR3 cells reduced by pH-dependent release of doxorubicin                                                       | [54] |
| HeLa (human cervix carcinoma);<br><br>A549 (human lung carcinoma);<br><br>NIH3T3-L1 (mouse fibroblasts)                 | Spheres       | 25nm                                                       | Functionalized with one of four cell penetrating peptides<br>Peptide RF: GLKKLAR-LFHKLLKLGC<br>Peptide RA: GLKKLAR-LAHKLLKLGC<br>Peptide EF: GLKKLAELFHKLLKLGC<br>Peptide EA : GLKKLAE-LAHKLLKLGC<br>Peptide TAT: GRK-KRRQRRRG; PEG-linked doxorubicin | 24h           | Endocytosis                                                                                                                                    | Close to cell nucleus                             | N.D. | Cell death increased when peptide-functionalized AuNPs are further loaded with doxorubicin; cell type dependent differences    | [24] |
| HeLa (human cervix carcinoma);<br><br>MCF10A (non-malignant breast cell line);<br><br>OVCAR-3 (human ovarian carcinoma) | Nanostars     | 25nm, (32nm hydrodynamic diameter after functionalization) | Single-stranded DNA aptamer AS1411, binds nucleolin                                                                                                                                                                                                    | 5, 7, 24, 72h | Uptake correlates with nucleolin presence on cell surface                                                                                      | 7h: cytoplasm, nuclear vicinity; nucleus          | N.D. | 70% reduction in HeLa cell viability after light-triggered aptamer release; 25% reduction in viability without aptamer release | [55] |
| HSC-3 (human oral squamous cell carcinoma), overexpress alpha V beta6 integrins;<br><br>HaCaT (immortalized             | Not specified | 30nm                                                       | PEGylated; functionalized with RGD or RGD plus SV40-NLS (KKKRK)                                                                                                                                                                                        | 24h           | Uptake higher for HSC-3 cells as compared to HaCaT cells                                                                                       | HSC-3: RGD - cytoplasm<br><br>RGD + NLS - nucleus | N.D. | 24h with 0.4nM AuNPs containing RGD/NLS. HSC-3: ~30% decrease in cell number<br>HaCaT: no significant cell                     | [56] |

|                                                                                                         |               |                                                                                                                |                                                                                                                                                                                                                                                                                                                                 |                                 |                                                                                                 |                                                                                                                                                                                                                       |      |                                                                                                           |      |
|---------------------------------------------------------------------------------------------------------|---------------|----------------------------------------------------------------------------------------------------------------|---------------------------------------------------------------------------------------------------------------------------------------------------------------------------------------------------------------------------------------------------------------------------------------------------------------------------------|---------------------------------|-------------------------------------------------------------------------------------------------|-----------------------------------------------------------------------------------------------------------------------------------------------------------------------------------------------------------------------|------|-----------------------------------------------------------------------------------------------------------|------|
| human keratinocytes)                                                                                    |               |                                                                                                                |                                                                                                                                                                                                                                                                                                                                 |                                 |                                                                                                 | HaCaT:<br>AuNP uptake lower than for HSC-3                                                                                                                                                                            |      | loss                                                                                                      |      |
| LNCaP-Pro 5<br>(human prostate carcinoma)                                                               | Spheres       | 30nm                                                                                                           | PEGylated                                                                                                                                                                                                                                                                                                                       | 2, 12, 24h                      | AuNPs/cell<br><br>2h: $19.9 \pm 0.97$ ;<br><br>12h: $28.0 \pm 0.44$ ;<br><br>24h: $284 \pm 5.5$ | 2h: cell membrane;<br>12h: intracellular;<br>24h: close to nucleus;<br>vesicles with AuNPs concentrate at nuclear periphery                                                                                           | N.D. | N.D.                                                                                                      | [57] |
| HeLa (human cervix carcinoma)                                                                           | Not specified | $3.7 \pm 0.5$ nm                                                                                               | 3-mercaptopropionic acid; PEG; citrate; functionalized with-FITC                                                                                                                                                                                                                                                                | 1, 3, 6, 9, 12, 24, 36, 48, 72h | Time-dependent uptake; number of PEGylated AuNPs rising during first 6h; plateau at 24h.        | PEGylated AuNPs in cytoplasm, vesicles, nucleus                                                                                                                                                                       | N.D. | Viability for 10 $\mu$ M PEGylated AuNPs.<br><br>24h: >85%;<br>36h: >80 %<br>72h: 70%                     | [58] |
| HeLa (human cervix carcinoma)                                                                           | Not specified | 5, 10, 15, 20nm                                                                                                | Rhodamine-labeled SV40-NLS; (rhodamine-CGGGPKKKRKVGG), conjugated to BSA; number of NLSs/AuNP varied                                                                                                                                                                                                                            | 1-6h                            | AuNP uptake stimulated by NLS                                                                   | At 6h, NLS increased nuclear localization of 5nm AuNPs; no NLS/AuNP: 37.5% in nucleus; 150 NLSs/AuNP: 96.3% in nucleus                                                                                                | N.D. | Viability at 6h dependent on number of NLSs/5nm AuNP; for 150 NLSs/5nm AuNPs 65.9% cells viable           | [59] |
| HepG2 (human hepatocellular carcinoma)                                                                  | Not specified | 20nm<br><br>24.5 nm (non-functionalized AuNPs);<br><br>28 nm (AuNP + BSA);<br><br>29.5 nm (AuNP +BSA +peptide) | BSA conjugated to different peptides<br><br>(i) SV40-NLS; CGGGPKKKRKVGG<br><br>(ii) adenoviral NLS; CGGF-STSLRARKA<br><br>(iii) adenoviral signal, promotes receptor mediated endocytosis (RME); CKKKKKKSEDEYPYVPN<br><br>(iv) adenoviral fiber protein; CKKKKKKKSEDEYPYVP NFSTSLRARKA<br><br>(v) combination of (ii) and (iii) | 2h, 12h                         | Possibly receptor-mediated endocytosis for SV40-NLS                                             | (i) Cytoplasm, trapped in the endosome<br><br>(ii) No uptake<br><br>(iii) Cellular entry, but trapped in the endosome<br><br>(iv) Nuclear targeting<br><br>(v) Enhanced nuclear targeting for combination of peptides | N.D. | Loss of cell viability <5% after 12h incubation with AuNPs modified with adenoviral NLS or adenoviral RME | [39] |
| HeLa (human cervix carcinoma);<br><br>NIH3T3 (murine fibroblasts);<br><br>HepG2( human hepatocarcinoma) | Not specified | 20nm diameter<br><br>Hydrodynamic diameter of AuNP only 22nm<br><br>Hydrodynamic diameter of BSA-AuNP 26nm     | (i) SV40-NLS; CGGGPKKKRKVGG<br><br>(ii) adenovirus NLS; CGGFSTSLRARKA<br><br>(iii) HIV-1 Tat-NLS; CGGRKKRRQRRRAP<br><br>(iv) oligolysine plus integrin binding domain; CKKKKKKGGRGDMFG                                                                                                                                          | 0.5 - 6h                        | Uptake likely predominantly by endocytosis; cell-type and peptide dependent uptake              | Cell-type and peptide dependent intracellular distribution                                                                                                                                                            | N.D. | adenovirus-NLS-BSA-AuNP: 20% death of HeLa cells, 5% death of NIH3T3 cells                                | [48] |
| MCF7 (human breast carcinoma)                                                                           | Spherical     | 2, 6,10, 16nm                                                                                                  | Tiopronin plus triplex forming oligonucleo-                                                                                                                                                                                                                                                                                     | 24h                             | 24h, 100nM 2nm AuNPs; up to 40% in nucleus                                                      | Nucleus: 2nm, 6nm; cytoplasm,                                                                                                                                                                                         | N.D. | Viability 70% at 1 $\mu$ M                                                                                | [60] |

|                                                                                                                                                        |                  |                                                                                                                                                             |                                                                                                                                                                                          |                 |                                                                                                                                                     |                                                                                                                                                                             |                                     |                                                                                     |      |
|--------------------------------------------------------------------------------------------------------------------------------------------------------|------------------|-------------------------------------------------------------------------------------------------------------------------------------------------------------|------------------------------------------------------------------------------------------------------------------------------------------------------------------------------------------|-----------------|-----------------------------------------------------------------------------------------------------------------------------------------------------|-----------------------------------------------------------------------------------------------------------------------------------------------------------------------------|-------------------------------------|-------------------------------------------------------------------------------------|------|
|                                                                                                                                                        |                  |                                                                                                                                                             | tide that can bind to c-MYC promoter P2                                                                                                                                                  |                 |                                                                                                                                                     | vesicles: 10nm, 16nm                                                                                                                                                        |                                     |                                                                                     |      |
| hTERT-BJ1 (telomerase-immortalized human fibroblasts)                                                                                                  | Not specified    | 2.8nm (average)                                                                                                                                             | Tiopronin or tiopronin plus TAT-peptide                                                                                                                                                  | 1h, 24h         | N.D.                                                                                                                                                | Tiopronin: vacuoles, or in vicinity of mitochondria<br>Tiopronin plus TAT-peptide: nucleus                                                                                  | N.D.                                | 24h, 10 $\mu$ M AuNPs with tiopronin or tiopronin+TAT-peptide: viability $\geq$ 80% | [61] |
| hTERT-BJ1 (telomerase immortalized primary human fibroblasts)                                                                                          | Not specified    | 5, 35nm                                                                                                                                                     | Tiopronin and further functionalization;<br>5nm: +/- TAT peptide;<br>30nm: PEG, +/- TAT peptide                                                                                          | 1h              | Uptake does not require clathrin-mediated endocytosis                                                                                               | 5nm +TAT: nucleus;<br>30nm + PEG: cell periphery, cytoplasm;<br>30nm +PEG +TAT: cytoplasm                                                                                   | N.D.                                | N.D.                                                                                | [62] |
| CP70 ( human ovarian carcinoma);<br>A2780 (human ovarian carcinoma);<br><br>BECs (human bronchial epithelium);<br><br>ASM (human airway smooth muscle) | Not specified    | ~2nm core; hydrodynamic diameter of AuNPs: positive charge, 9.31nm; negative charge, 9.49nm; neutral, 11.43nm, zwitterionic, 11.15 nm                       | AuNP carrying different charges;<br><br>positive, negative, neutral, zwitterionic                                                                                                        | 5, 30min; 2, 6h | In all cells uptake of positively charged AuNPs significantly higher than other AuNPs tested. CP70 cells take up only positively charged AuNPs only | Intracellular                                                                                                                                                               | N.D.                                | 30min treatment with positively charged AuNPs decreased viability of BECs and ASM   | [63] |
| 1BR3G (transformed human skin fibroblasts)                                                                                                             | Spherical        | 4, 9, 13nm                                                                                                                                                  | 11-amino-1-undecanethiol (positive charge); CIPGNVG-PEG-NH <sub>2</sub> (positive charge); CIPGNVG-PEG-COOH (negative charge)                                                            | 30min, 1, 3h    | Uptake likely through endocytosis; higher for CIPGNVG-PEG-NH <sub>3</sub> <sup>+</sup> than CIPGNVG-PEG-COO <sup>-</sup>                            | AuNPs functionalized with CIPGNVG-PEG-NH <sub>3</sub> <sup>+</sup> locate to intracellular vesicles, nucleus                                                                | N.D.                                | No significant toxicity of peptide-coated particles after 3 or 24h                  | [64] |
| MCF7 (human breast carcinoma);<br><br>MDA-MB-468 (human breast carcinoma)                                                                              | Not specified    | 14, 50, 74nm; hydrodynamic diameter upon BSA- coating: 14nm $\rightarrow$ 28.5 $\pm$ 2.5; 50nm $\rightarrow$ 78 $\pm$ 3 .1; 74nm $\rightarrow$ 95 $\pm$ 4.2 | coated with BSA- Alexa-647 (fluorescent), transferrin and EGF                                                                                                                            | 30min, 8h       | Receptor mediated endocytosis; uptake depends on size and surface modification; highest uptake for 50nm AuNPs; highest uptake for uncoated AuNPs    | Endosomes or lysosomes                                                                                                                                                      | N.D.                                | N.D.                                                                                | [65] |
| MCF7 (human breast carcinoma);<br><br>HuMEC, (human myoepithelial breast cells)                                                                        | Spheres, flowers | Small spheres 15.6 $\pm$ 1.6nm; large spheres, 60 $\pm$ 2nm; flowers, 40-120nm                                                                              | PEGylated                                                                                                                                                                                | 24h, overnight  | N.D.                                                                                                                                                | MCF7; small spheres: nucleus, cytoplasm, nanoflowers: nucleus, cytoplasm, large spheres: nuclear surface<br><br>HuMEC; nanoflowers and large spheres associated with nuclei | N.D.                                | Small spheres more toxic than nanoflowers; large spheres not toxic                  | [46] |
| HeLa (human cervix carcinoma)                                                                                                                          | Not specified    | 16nm                                                                                                                                                        | PEGylated and further functionalized with CALNN and peptides containing the CALNN sequence;<br><br>CALNN-TAT peptide: CALNN-AGRKKRRQRRR;<br><br>CALNN-Pntn peptide: CALNN-GRQIKIWFQNRRM- | 2h              | Likely multiple uptake routes, including clathrin-independent and clathrin-dependent pathways                                                       | Endosomes (CALNN-TAT, CALNN-Pntn);<br><br>Cytosol and endosome (CALNN-TAT + CALNN-Pntn);<br><br>Endosomes and nucleus, but not cytosol                                      | Most particles eliminated after 48h | N.D.                                                                                | [66] |

|                                                                                                            |           |                                                                                              |                                                                                                                                                                                                                                              |                                                                                         |                                                                                                                                                                    |                                                                                                                                                     |                                                                   |                                                                                                                    |      |
|------------------------------------------------------------------------------------------------------------|-----------|----------------------------------------------------------------------------------------------|----------------------------------------------------------------------------------------------------------------------------------------------------------------------------------------------------------------------------------------------|-----------------------------------------------------------------------------------------|--------------------------------------------------------------------------------------------------------------------------------------------------------------------|-----------------------------------------------------------------------------------------------------------------------------------------------------|-------------------------------------------------------------------|--------------------------------------------------------------------------------------------------------------------|------|
|                                                                                                            |           |                                                                                              | KWKK;<br><br>CALNN-NLS peptide:<br>CALNN-GGFSTSLRARKA<br><br>Combination of the peptides                                                                                                                                                     |                                                                                         |                                                                                                                                                                    | (CALNN-NLS)<br><br>cytosol, endosomes,<br>nucleus (CALNN-<br>NLS + CALNN-TAT<br>+ CALNN-Pntn)                                                       |                                                                   |                                                                                                                    |      |
| HSC-3<br>(human oral squamous<br>cell carcinoma);<br><br>HaCaT (immortalized<br>human keratinocytes)       | Nanorods  | Not specified, aspect<br>ratio 2.4                                                           | SV40-NLS                                                                                                                                                                                                                                     | 2h                                                                                      | N.D., possibly receptor-mediated<br>endocytosis;<br>NLS stimulates cellular uptake                                                                                 | Cytoplasm and nucle-<br>us; higher abundance<br>of nanorods in nuclei<br>of cancer HSC-3 cells                                                      | N.D.                                                              | N.D.                                                                                                               | [67] |
| HeLa (human cervix<br>carcinoma)                                                                           | Spheres   | 15nm; hydrodynamic<br>diameter citrate-capped<br>18.2 ± 0.1nm, with<br>peptides 20.5 ± 0.2nm | Citrate-capped or peptide-<br>modified; stabilizing peptide:<br>CALNN,<br>cellular uptake: RGD,<br>nuclear targeting: CGGRK-<br>KRRQRRRAP,<br>cellular uptake + nuclear<br>targeting:<br>CKKKKKKGGRGDMFG,<br>or RGD plus CGGRK-<br>KRRQRRRAP | 6, 8h                                                                                   | Endocytosis,<br>higher uptake when RGD se-<br>quence present                                                                                                       | Citrate-capped: endo-<br>somes, lysosomes;<br><br>NLS-carrying AuNPs:<br>cytoplasm and nucleus                                                      | Smaller percentage<br>exocytosed if AuNPs<br>capped with peptides | No toxicity short-term or in<br>clonogenic assays                                                                  | [68] |
| K562<br>(human chronic mye-<br>logenous leukemia)                                                          | Spheres   | 4, 12, 18nm<br>diameter                                                                      | 4nm AuNPs: cysteine and<br>citrate-capped;<br><br>12nm AuNPs: glucose-<br>reduced;<br><br>18nm AuNPs: citrate, biotin,<br>cetyltrimethylammonium<br>bromide (CTAB)                                                                           | 15min-24h<br>(uptake e<br>evalua-<br>tion);<br>up to 5<br>days for<br>cytotoxici-<br>ty | Rapid uptake of 18nm citrate-<br>capped AuNPs; AuNP concentra-<br>tion in medium plateaus after 1h                                                                 | Possibly endocytic<br>vesicles                                                                                                                      | N.D.                                                              | No toxicity observed                                                                                               | [69] |
| KB (human carcinoma,<br>overexpress folate recep-<br>tors);<br><br>WI-38 (human fetal lung<br>fibroblasts) | Spherical | 10nm diameter                                                                                | Citrate-capped;<br>mPEG-thioctamide or folate-<br>PEG-thioctamide<br>functionalized                                                                                                                                                          | 1, 2h                                                                                   | KB:<br>~0.25-1.0 × 10 <sup>15</sup> folate-PEG-<br>thioctic acid modified AuNPs/ml<br><br>WI-38: sporadic uptake of folate-<br>PEG-thioctic acid modified<br>AuNPs | KB: lysosomes close<br>to nucleus, endosomes                                                                                                        | N.D.                                                              | N.D.                                                                                                               | [70] |
| KB (human carcinoma)                                                                                       | Nanorods  | Not specified                                                                                | Coated with cetyltrimeth-<br>ylammonium bromide<br>(CTAB, cationic),<br>bis(p-sulfonatophenyl)<br>phenylphosphine (BSP,<br>anionic),<br>mPEG-dithiocarbamate<br>(mPEG-DTC, hydrophilic)                                                      | 24h                                                                                     | CTAB coat promotes nonspecific<br>uptake; nonspecific uptake re-<br>duced to 6% when CTAB re-<br>placed with mPEG-DTC                                              | Most AuNPs internal-<br>ized; shift to peri-<br>nuclear region within<br>24h                                                                        | No excretion over 5-day<br>period; aggregate for-<br>mation       | No apparent toxicity                                                                                               | [71] |
| KB (human carcinoma)                                                                                       | Nanorods  | Not specified                                                                                | CTAB,<br>folate functionalization                                                                                                                                                                                                            | 5h                                                                                      | Endocytic vesicles                                                                                                                                                 | CTAB: readily inter-<br>nalized, perinuclear,<br><br>Folate:<br>initially several hours<br>located at cell surface;<br>followed by endocyto-<br>sis | N.D.                                                              | Photothermal damage after<br>30sec NIR<br>irradiation (membrane<br>blebbing, increased mem-<br>brane permeability) | [72] |
| SKOV-3,<br>OVCAR-5,<br>OV-202,<br>OV-167 (ovarian carci-                                                   | Spherical | 5nm                                                                                          | Folic acid<br>combined with different PEG<br>backbones                                                                                                                                                                                       | 5min, 1h                                                                                | Endocytosis;<br>folate receptor abundance corre-<br>lates with uptake; for ovarian<br>carcinoma cells OV-167                                                       | Late and early endo-<br>somes                                                                                                                       | N.D.                                                              | N.D.                                                                                                               | [73] |

|                                                                                                                                                                   |                                                                         |                                                                                                                                                                                                                                           |                                                                                |                                                                 |                                                                                                                                                                  |                                                                                                                                             |      |                                                                                                                                                          |      |
|-------------------------------------------------------------------------------------------------------------------------------------------------------------------|-------------------------------------------------------------------------|-------------------------------------------------------------------------------------------------------------------------------------------------------------------------------------------------------------------------------------------|--------------------------------------------------------------------------------|-----------------------------------------------------------------|------------------------------------------------------------------------------------------------------------------------------------------------------------------|---------------------------------------------------------------------------------------------------------------------------------------------|------|----------------------------------------------------------------------------------------------------------------------------------------------------------|------|
| noma);<br><br>OPM-1, RPMI, U266 (multiple myeloma)                                                                                                                |                                                                         |                                                                                                                                                                                                                                           |                                                                                |                                                                 | with highest, OVCAR-5 with lowest uptake                                                                                                                         |                                                                                                                                             |      |                                                                                                                                                          |      |
| SKOV-3 (ovarian carcinoma);<br><br>CCRF-CEM (human acute lymphoblastic leukemia);<br><br>CCD-18Co (human colon myofibroblasts)                                    | Spherical, triangular, ball- or sponge-like; shape depending on peptide | Linear peptide: individual AuNPs, spherical 4-35nm; multiple AuNPs in ball-shaped structures, 900-1000nm;<br><br>Circular peptide: individual AuNPs, spherical, triangular, 6-60nm; multiple AuNPs in sponge-like agglomerates, 250-450nm | Linear peptide, l(KW) <sub>5</sub> ;<br><br>cyclic peptide, c[KW] <sub>5</sub> | 1h, 24-72h for toxicity; 2, 12, 24, 48h for doxorubicin release | Likely several uptake routes; not limited to clathrin-mediated endocytosis, caveolae-mediated endocytosis or macropinocytosis; higher uptake with cyclic peptide | Cytoplasm for linear peptide; mostly nuclear for cyclic peptide                                                                             | N.D. | No toxicity in SKOV-3 cells for AuNPs coated with cyclic peptide; antiproliferative effect of camptothecin increased by AuNPs coated with cyclic peptide | [74] |
| RAW264.7 (mouse macrophage)                                                                                                                                       | Spherical on average                                                    | 3-8nm                                                                                                                                                                                                                                     | Uncapped, capped with lysine or poly-L-lysine, functionalized with FITC        | 24, 48, 72h                                                     | Endocytosis, possibly pinocytosis                                                                                                                                | Lysosomes, located in perinuclear region                                                                                                    | N.D. | Viability (100nM uncapped AuNPs): 48h - 90%, 72h - 85%                                                                                                   | [75] |
| Hep3B hepatocellular carcinoma), cultured cells and xenograft in Balb/c nude mice;<br><br>293T cells (human embryonic kidney cells containing SV40 T-antigen)     | Spherical                                                               | Without dexamethasone: 87.3 ± 6.16nm, 55.3 ± 5.37nm, 40.8 ± 2.47nm; with dexamethasone: 99.2 ± 7.33nm, 56.2 ± 6.91nm, 38.2 ± 1.56nm                                                                                                       | DNA, polyethyleneimine, without or with dexamethasone                          | 4h; for toxicity 24h                                            | Endocytosis                                                                                                                                                      | Nucleus and cytoplasm; significant increase of nuclear targeting with dexamethasone                                                         | N.D. | Viability of cultured cells ≥ 80% for EGFP-encoding plasmid; AuNP-mediated synthesis of TRAIL inhibits tumor growth in mice                              | [76] |
| Mouse embryonic fibroblasts                                                                                                                                       | Clusters                                                                | 2nm                                                                                                                                                                                                                                       | DNA; photolabile AuNPs; UV-induced release of DNA                              | 6h                                                              | N.D.                                                                                                                                                             | Intracellular; DNA released by UV irradiation; DNA in nucleus                                                                               | N.D. | N.D.                                                                                                                                                     | [77] |
| HOC-313 clone 8 (human head and neck squamous cell carcinoma);<br><br>HSC-3 (human oral squamous cell carcinoma);<br><br>HaCaT (immortalized human keratinocytes) | Not specified                                                           | 35nm                                                                                                                                                                                                                                      | Unconjugated, conjugated to anti-EGFR antibodies                               | 48h for colloidal gold; 40min for anti-EGFR conjugated AuNPs    | Endocytosis                                                                                                                                                      | Unconjugated AuNPs: in cytoplasm of all cells tested;<br><br>anti-EGFR-AuNPs: HOC-313 and HSC-3 cells – cell surface; HaCaT – weak labeling | N.D. | N.D.                                                                                                                                                     | [78] |
| HOC-313 clone 8 (human head and neck squamous cell carcinoma);<br><br>HSC-3 (human oral squamous cell carcinoma);<br><br>HaCaT (immortalized human keratinocytes) | Nanorods                                                                | <5nm, aspect ratio 3.9                                                                                                                                                                                                                    | CTAB-capped; further modified and conjugated to anti-EGFR antibodies           | 30min; room temperature                                         | Higher AuNP uptake by malignant cells, because of higher EGFR abundance in plasma membrane                                                                       | N.D.                                                                                                                                        | N.D. | NIR laser-induced killing more efficient for cancer cells                                                                                                | [79] |
| HeLa (human cervix carcinoma)                                                                                                                                     | Nanorods                                                                | 18x40nm                                                                                                                                                                                                                                   | Original coating CTAB; further modified with                                   | 6h                                                              | Surface coat and charge determine uptake; highest uptake for                                                                                                     | Intracellular vesicles                                                                                                                      | N.D. | CTAB: 79.2% viability in serum-                                                                                                                          | [80] |

|                                                                                                                                              |               |                             |                                                                                                                                                                                                    |            |                                                                                                                                                                                                                                                                                                                   |                                                                                                                                                                                               |      |                                                                                                                                                                               |      |
|----------------------------------------------------------------------------------------------------------------------------------------------|---------------|-----------------------------|----------------------------------------------------------------------------------------------------------------------------------------------------------------------------------------------------|------------|-------------------------------------------------------------------------------------------------------------------------------------------------------------------------------------------------------------------------------------------------------------------------------------------------------------------|-----------------------------------------------------------------------------------------------------------------------------------------------------------------------------------------------|------|-------------------------------------------------------------------------------------------------------------------------------------------------------------------------------|------|
|                                                                                                                                              |               |                             | polyelectrolytes to produce nanorods with different surface charges;<br>Examples:<br>positive charge - poly(diallyldimethyl ammonium chloride);<br>negative charge - poly(4-styrene sulfonic acid) |            | poly(diallyldimethyl ammonium chloride);<br><br>lowest uptake for poly(4-styrenesulfonic acid)                                                                                                                                                                                                                    |                                                                                                                                                                                               |      | free medium; not toxic in medium with serum;<br><br>poly(diallyldimethyl ammonium chloride): 88.3% viability in medium with serum                                             |      |
| MCF7 (human breast carcinoma);<br><br>MCF10A (non-malignant breast cell line)                                                                | Not specified | 10.8nm                      | Cysteamine-capped (AuNPs positively charged),<br>thioglucose-capped                                                                                                                                | 2h         | MCF7 cells; cysteamine-capped: $1.187 \times 10^5$ AuNPs/cell;<br>thioglucose-capped: $2.96 \times 10^4$ /cell                                                                                                                                                                                                    | In MCF7 cysteamine-capped AuNPs bound to cell membrane;<br>thioglucose-capped AuNPs in cytoplasm                                                                                              | N.D. | No significant changes in MCF7 cell viability at 24, 48, 72h; AuNPs enhance toxicity of low-energy X-rays in MCF7 cells                                                       | [27] |
| COS-1 (African green monkey kidney cells)                                                                                                    | Not specified | 2.4, 5.5, 8.2, 16, 38, 89nm | PEG-functionalized dithiolane ligands that end with methoxy or carboxyl group; carboxyl group covalently attached to cell penetrating peptides                                                     | 2-3h       | Uptake likely by endocytosis, facilitated by cell penetrating peptides                                                                                                                                                                                                                                            | Cell penetrating peptide-AuNPs:<br>2.4nm – nucleus;<br>5.5nm – mostly perinuclear; 8.2nm – mostly cell membrane;<br>16, 38, 89nm – no uptake; 16, 38nm – cell periphery;<br>89nm – aggregates | N.D. | Viability with cell penetrating peptide-AuNPs (200nM, 2h):<br>2.4nm - 97%;<br>8.2nm - 94%                                                                                     | [81] |
| HepG2 (human hepatocellular carcinoma; non-phagocytic);<br><br>RAW264.7 (virus transformed macrophage; phagocytic)                           | Not specified | 16-58nm                     | Citrate-capped;<br>further modification produced surfaces with positive quaternary ammonium groups or negative carboxyl groups                                                                     | 12, 24h    | Cell type, particle size and surface charge determine uptake;<br>Cell type: higher uptake of AuNPs with positive charges in HepG2 cells; similar uptake of AuNPs with positive or negative charges by RAW264.7 cells;<br>Size: positive charge, highest uptake for 58nm; negative charge, highest uptake for 40nm | 40nm AuNPs with negative or positive charges;<br><br>HepG2: secondary lysosomes<br><br>RAW264.7: AuNP aggregates in phagosomes, myelin whorls                                                 | N.D. | Based on MTT assay;<br>HepG2: positive surface charges more cytotoxic than negative<br><br>RAW 264.7: negative surface charges more cytotoxic than positive                   | [82] |
| SKBR3 (human breast carcinoma, HER2-overexpression)                                                                                          | Spheres       | $17.7 \pm 1.6$ nm           | Citrate (negative charges); poly(vinyl alcohol) (PVA, neutral); poly(allyamine hydrochloride) (PAA, positive charges)                                                                              | 0-24h      | Higher uptake with positive charges                                                                                                                                                                                                                                                                               | Internalized, location not specified                                                                                                                                                          | N.D. | Viability >90% (24h, 0.027 nM AuNPs)                                                                                                                                          | [45] |
| Balb/3T3 (mouse fibroblasts)                                                                                                                 | Not specified | 5, 15nm                     | Citrate stabilized                                                                                                                                                                                 | 2, 24, 72h | At each time point more 5nm AuNPs internalized than 15nm particles                                                                                                                                                                                                                                                | Intracellular vesicles, endosomes/lysosomes                                                                                                                                                   | N.D. | 72h, $\geq 50 \mu\text{M}$ ;<br>5nm, but not 15nm, AuNPs cause significant loss of colony formation. Both AuNPs - no cytotoxicity in Trypan blue assays                       | [83] |
| HeLa (human cervix carcinoma);<br><br>SK-Mel-28 (human melanoma);<br><br>L929 (mouse fibroblasts);<br><br>J774A1 (mouse monocyte/macrophage) | Not specified | 0.8-15nm                    | Triphenylphosphine monosulfonate, tris-sulfonated triphenylphosphine                                                                                                                               | up to 48h  | N.D.                                                                                                                                                                                                                                                                                                              | 1.4nm cluster binds major groove of B-DNA; 20-25% AuNPs associated with DNA-containing fractions of the nucleus                                                                               | N.D. | AuNPs of 1-2nm particularly toxic; highest toxicity for 1.4nm cluster; death by apoptosis and/or necrosis; toxicity during logarithmic growth higher than in stationary phase | [84] |

|                                                                                                          |               |                                                               |                                                                                                                                                                                                                                          |                     |                                                                                                                                                              |                                                                                                                                                                                                                                                                                               |                                                                     |                                                                                                                                                                                |      |
|----------------------------------------------------------------------------------------------------------|---------------|---------------------------------------------------------------|------------------------------------------------------------------------------------------------------------------------------------------------------------------------------------------------------------------------------------------|---------------------|--------------------------------------------------------------------------------------------------------------------------------------------------------------|-----------------------------------------------------------------------------------------------------------------------------------------------------------------------------------------------------------------------------------------------------------------------------------------------|---------------------------------------------------------------------|--------------------------------------------------------------------------------------------------------------------------------------------------------------------------------|------|
| MCF7 (human breast carcinoma) monolayer, MCF7 spheroids, xenograft mouse model (MCF7-S cells)            | Spherical     | 2, 6, 15nm                                                    | Tiopronin                                                                                                                                                                                                                                | 3, 24h              | Size-dependent uptake;<br>(i) Monolayer, AuNPs/cell, 2nm >> 6nm ≈ 15nm<br><br>(ii) AuNPs/ spheroid 2nm >6nm > 15nm<br>(iii) Mouse model; Tumor: 2nm>6nm>15nm | Monolayer;<br>2, 6nm: nucleus, cytoplasm;<br>15nm: cytoplasm<br>Spheroids;<br>2, 6nm: inner and outer cell layers; nucleus, cytoplasm;<br>15nm: mostly on spheroid surface; cytoplasm;<br>Tumor;<br>2, 6nm: nucleus, cytoplasm;<br>15nm: cytoplasm                                            | All AuNPs eliminated from blood; fastest elimination for 15nm AuNPs | Not toxic for MCF7 monolayers during 24h incubation                                                                                                                            | [85] |
| HeLa (human cervix carcinoma)                                                                            | N.D.          | Non- functionalized 13.4nm; with pro-apoptotic peptide 14.6nm | Without and with pro-apoptotic peptide AD-DA-ADDA-GG-D(KLAKLAK) <sub>2</sub>                                                                                                                                                             | 4, 12, 24, 48, 72h; | Endocytosis                                                                                                                                                  | Endosomal vesicles                                                                                                                                                                                                                                                                            | N.D.                                                                | 72h, AuNPs with pro-apoptotic peptide: 59% apoptotic or necrotic cells; mitochondrial damage                                                                                   | [33] |
| Adult male Sprague-Dawley rat hearts; ventricular myocytes, permeabilized cells or isolated mitochondria | Not specified | 3, 6nm                                                        | Polyvinylpyrrolidone                                                                                                                                                                                                                     | 10, 20min           | N.D.                                                                                                                                                         | Permeabilized myocytes:<br>3nm: accumulated in mitochondria;<br>6nm: predominantly in cytoplasm, no entry into mitochondria<br><br>Isolated cardiac mitochondria:<br>3nm: mitochondrial intermembrane space<br>6nm: no entry into mitochondria; located close to outer mitochondrial membrane | N.D.                                                                | N.D.                                                                                                                                                                           | [86] |
| HeLa (human cervix carcinoma)                                                                            | Not specified | 8-12nm                                                        | Not specified; embedded in high density octa-arginine –modified liposomes                                                                                                                                                                | 1h                  | Macropinocytosis (clathrin-independent uptake)                                                                                                               | Entry into mitochondria                                                                                                                                                                                                                                                                       | N.D.                                                                | N.D.                                                                                                                                                                           | [87] |
| A549 (human lung carcinoma)                                                                              | Nanorods      | aspect ratio 4.2; length 55.6±7.8nm; width 13.3±1.8nm         | CTAB (positive surface charge);<br>CTAB+ poly (diallyldimethyl ammonium chloride), (PDDAC, positive surface charge);<br><br>CTAB + polystyrene sulfonate (PSS, negative surface charge),<br><br>PEGylated (PEG, negative surface charge) | 12, 24h             | N.D.                                                                                                                                                         | CTAB: cell membrane<br><br>PDDAC, PSS: endosomes, lysosomes<br><br>PEG: very few internalized                                                                                                                                                                                                 | N.D.                                                                | Highest toxicity for CTAB–AuNPs in serum-free medium; 50μM CTAB-AuNPs, 12h - 60% viability; 24h - 40% viability; CTAB-AuNPs with altered mitochondrial morphology and function | [88] |
| HeLa (human cervix carcinoma);                                                                           | Nanoclusters  | 8.07±1.77 nm                                                  | Chitosan-coated; chitosan-coated plus cova-                                                                                                                                                                                              | 0.5, 1, 2, 4, 24h   | N.D.                                                                                                                                                         | Mitochondria                                                                                                                                                                                                                                                                                  | N.D.                                                                | 24h, 60μg/ml chitosan-TPP modified nanoclusters: sig-                                                                                                                          | [89] |

|                                                                                                                                                                                                                    |               |                                                                                                                                                                                                             |                                                               |                                   |      |                                                                                                                            |                                                                                                    |                                                                                                                                                                                                                                                              |      |
|--------------------------------------------------------------------------------------------------------------------------------------------------------------------------------------------------------------------|---------------|-------------------------------------------------------------------------------------------------------------------------------------------------------------------------------------------------------------|---------------------------------------------------------------|-----------------------------------|------|----------------------------------------------------------------------------------------------------------------------------|----------------------------------------------------------------------------------------------------|--------------------------------------------------------------------------------------------------------------------------------------------------------------------------------------------------------------------------------------------------------------|------|
| HepG2 (human hepatocellular carcinoma)                                                                                                                                                                             |               |                                                                                                                                                                                                             | lently attached triphenylphosphonium (TPP) cations            |                                   |      |                                                                                                                            |                                                                                                    | nificant toxicity                                                                                                                                                                                                                                            |      |
| 1.4E7 cells (hybrid cell line, fusion of human pancreatic islets cells with human pancreatic cancer cells, PANC-1);<br><br>HeB5 non-cancerous mouse liver epithelial cell line                                     | Not specified | Not specified                                                                                                                                                                                               | Near infrared (NIR) laser activation of AuNPs                 | 1, 5, 30min, 1, 5, 24h            | N.D. | Mitochondria                                                                                                               | N.D.                                                                                               | NIR activation increased apoptosis of 1.4E7 cells                                                                                                                                                                                                            | [90] |
| PC3 (human prostate carcinoma);<br><br>DU145 (human prostate carcinoma);<br><br>MCF7 (human breast carcinoma);<br><br>RAW264.7 (mouse macrophage);<br><br>human mesenchymal stem cells;<br><br>Sprague Dawley rats | Spheres       | Targeting AuNPs :<br>T-AuNP, $3.1 \pm 0.8\text{nm}$ ;<br><br>T-3-BP- AuNP, $4.3 \pm 0.7\text{nm}$<br><br>Non-targeting AuNPs:<br>NT-AuNP, $2.9 \pm 1.2\text{nm}$ ;<br>NT-3-BP- AuNP, $3.1 \pm 0.9\text{nm}$ | PEGylated, triphenylphosphonium (TPP), 3-bromopyruvate (3-BP) | 4, 6, 12h; 72h for toxicity tests | N.D. | T-AuNP: mitochondria>> cytoplasm<br><br>T-3-BP- AuNP : mitochondria>>> cytoplasm<br><br>NT-AuNPs : mitochondria> cytoplasm | $t_{1/2}$ for plasma clearance:<br>T-AuNPs $4.3 \pm 0.3\text{h}$<br>NT-AuNPs $8.8 \pm 0.2\text{h}$ | Increased damage when 3-bromopyruvate coupled to AuNPs;<br>T-AuNPs more toxic than NT-AuNPs;<br>laser irradiation further reduces viability of AuNP-treated PC3 cells; T-AuNPs or NT-AuNPs do not trigger pro-inflammatory cytokine synthesis in macrophages | [91] |
